# Supplementary material
Source: Research Square preprint supplement (doi:10.21203/rs.3.rs-8651603/v1)
Supplement: Supplementary file 1 [file ac1a73e03f176f8313b094e6.docx]

**Supplementary Materials**

Supplementary Table 1

| Land-use Patterns | Points of Sampling | Longitudes | Latitudes |
| --- | --- | --- | --- |
| Forest Soils | Point #1 | 26.948oN | 92.831oE |
| Point #2 | 26.946oN | 92.831oE |
| Point #3 | 26.946oN | 92.831oE |
| Point #4 | 26.938oN | 92.842oE |
| Point #5 | 26.941oN | 92.842oE |
| Point #6 | 26.937oN | 92.844oE |
| Point #7 | 26.947oN | 92.833oE |
| Point #8 | 26.929oN | 92.839oE |
| Point #9 | 26.931oN | 92.840oE |
| Point #10 | 26.932oN | 92.837oE |
| Point #11 | 26.923oN | 92.832oE |
| Point #12 | 26.926oN | 92.840oE |
| Point #13 | 26.929oN | 92.827oE |
| Point #14 | 26.930oN | 92.830oE |
| Point #15 | 26.934oN | 92.831oE |
| Point #16 | 26.919oN | 92.837oE |
| Point #17 | 26.918oN | 92.833oE |
| Point #18 | 26.910oN | 92.830oE |
| Point #19 | 26.931oN | 92.856oE |
| Point #20 | 26.936oN | 92.846oE |
| Point #21 | 26.935oN | 92.844oE |
| Tea-growing Soils | Point #1 | 26.865oN | 92.705oE |
| Point #2 | 26.865oN | 92.703oE |
| Point #3 | 26.866oN | 92.704oE |
| Point #4 | 26.865oN | 92.701oE |
| Point #5 | 26.864oN | 92.699oE |
| Point #6 | 26.863oN | 92.699oE |
| Point #7 | 26.861oN | 92.702oE |
| Point #8 | 26.858oN | 92.702oE |
| Point #9 | 26.867oN | 92.704oE |
| Point #10 | 26.862oN | 92.697oE |
| Point #11 | 26.863oN | 92.699oE |
| Point #12 | 26.865oN | 92.705oE |
| Point #13 | 26.868oN | 92.699oE |
| Point #14 | 26.869oN | 92.700oE |
| Point #15 | 26.868oN | 92.703oE |
| Point #16 | 26.860oN | 92.707oE |
| Point #17 | 26.858oN | 92.707oE |
| Point #18 | 26.861oN | 92.709oE |
| Point #19 | 26.860oN | 92.702oE |
| Point #20 | 26.858oN | 92.703oE |
| Point #21 | 26.865oN | 92.697oE |
| Rice paddy soils | Point #1 | 27.273oN | 94.121oE |
| Point #2 | 27.271oN | 94.086oE |
| Point #3 | 27.112oN | 93.938oE |
| Point #4 | 27.121oN | 93.221E |
| Point #5 | 27.122oN | 93.894oE |
| Point #6 | 27.123oN | 93.890oE |
| Point #7 | 27.120oN | 93.892oE |
| Point #8 | 27.008oN | 93.839oE |
| Point #9 | 26.960oN | 93.839oE |
| Point #10 | 26.944oN | 93.837oE |
| Point #11 | 27.144oN | 93.961oE |
| Point #12 | 27.120oN | 93.884oE |
| Point #13 | 27.132oN | 93.943oE |
| Point #14 | 27.144oN | 93.961oE |
| Point #15 | 27.458oN | 94.312oE |
| Point #16 | 27.453oN | 94.317oE |
| Point #17 | 27.451oN | 94.324oE |
| Point #18 | 27.483oN | 94.309oE |
| Point #19 | 27.484oN | 94.297oE |
|  | Point #20 | 27.467oN | 94.306oE |
|  | Point #21 | 27.454oN | 94.304oE |

Supplementary Table 2

Concentrations (%) of total organic C and its fractions based on lability in soil of different land-use systems

| **Land-use Patterns** | **Organic C** | **Bulk Density**  **(g cc-1)** | **Carbon Stock (Mg ha-1)** | **C-24N** | **C-18N** | **C-9N** |
| --- | --- | --- | --- | --- | --- | --- |
| T-1 | 1.94 | 1.38 | 37.90 | 1.21 | 1.07 | 0.66 |
| T2 | 1.64 | 1.08 | 0.97 | 0.74 |
| T-3 | 0.91 | 0.68 | 0.55 | 0.43 |
| T-4 | 0.81 | 0.73 | 0.64 | 0.51 |
| T-5 | 1.62 | 1.21 | 0.91 | 0.69 |
| T-6 | 1.92 | 1.19 | 0.85 | 0.71 |
| T-7 | 2.16 | 1.68 | 1.23 | 1.05 |
| T-8 | 1.64 | 1.24 | 0.91 | 0.73 |
| T-9 | 2.37 | 1.8 | 1.37 | 1.04 |
| T-10 | 2.15 | 1.93 | 1.41 | 1.16 |
| T-11 | 2.62 | 1.74 | 1.49 | 1.08 |
| T-12 | 1.44 | 1.23 | 0.96 | 0.71 |
| T-13 | 1.56 | 1.23 | 0.93 | 0.79 |
| T-14 | 2.04 | 1.36 | 0.95 | 0.79 |
| T-15 | 1.19 | 0.7 | 0.64 | 0.43 |
| T-16 | 1.36 | 1.18 | 0.81 | 0.58 |
| T-17 | 2.22 | 1.84 | 1.37 | 0.94 |
| T-18 | 2.49 | 2.06 | 1.51 | 1.03 |
| T-19 | 2.1 | 1.59 | 1.14 | 0.83 |
| T-20 | 1.85 | 1.47 | 1.08 | 0.96 |
| T-21 | 2.42 | 2.13 | 1.81 | 1.43 |
| R-1 | 0.598 | 1.29 | 14.86 | 0.511 | 0.429 | 0.394 |
| R-2 | 0.611 | 0.564 | 0.413 | 0.396 |
| R-3 | 0.565 | 0.507 | 0.449 | 0.402 |
| R-4 | 0.709 | 0.632 | 0.527 | 0.449 |
| R-5 | 0.646 | 0.597 | 0.438 | 0.411 |
| R-6 | 0.549 | 0.439 | 0.383 | 0.341 |
| R-7 | 0.836 | 0.785 | 0.71 | 0.611 |
| R-8 | 0.796 | 0.704 | 0.639 | 0.528 |
| R-9 | 0.906 | 0.783 | 0.679 | 0.597 |
| R-10 | 0.828 | 0.691 | 0.588 | 0.524 |
| R-11 | 0.749 | 0.638 | 0.569 | 0.501 |
| R-12 | 1.026 | 0.846 | 0.797 | 0.685 |
| R-13 | 0.906 | 0.817 | 0.731 | 0.609 |
| R-14 | 0.749 | 0.693 | 0.596 | 0.521 |
| R-15 | 0.811 | 0.695 | 0.62 | 0.539 |
| R-16 | 1.026 | 0.841 | 0.797 | 0.697 |
| R-17 | 0.828 | 0.673 | 0.591 | 0.507 |
| R-18 | 0.646 | 0.484 | 0.408 | 0.328 |
| R-19 | 0.792 | 0.711 | 0.585 | 0.505 |
| R-20 | 0.836 | 0.651 | 0.591 | 0.449 |
| R-21 | 0.709 | 0.572 | 0.44 | 0.367 |
| F-1 | 2.690 | 1.32 | 64.71 | 2.308 | 1.944 | 1.184 |
| F-2 | 3.411 | 3.108 | 2.633 | 1.971 |
| F-3 | 4.079 | 3.476 | 2.979 | 1.947 |
| F-4 | 3.411 | 2.907 | 2.385 | 1.855 |
| F-5 | 3.725 | 3.196 | 2.438 | 1.733 |
| F-6 | 2.910 | 2.308 | 1.449 | 0.901 |
| F-7 | 2.093 | 1.689 | 1.476 | 0.947 |
| F-8 | 3.725 | 3.115 | 2.474 | 1.820 |
| F-9 | 4.295 | 3.647 | 2.811 | 1.844 |
| F-10 | 3.181 | 2.497 | 1.691 | 0.976 |
| F-11 | 3.927 | 3.296 | 2.853 | 1.748 |
| F-12 | 3.079 | 2.353 | 1.907 | 1.244 |
| F-13 | 3.647 | 2.971 | 2.436 | 1.947 |
| F-14 | 2.947 | 2.414 | 1.901 | 1.296 |
| F-15 | 3.226 | 2.851 | 2.371 | 1.867 |
| F-16 | 2.439 | 2.097 | 1.493 | 0.917 |
| F-17 | 3.097 | 2.588 | 1.907 | 1.186 |
| F-18 | 3.380 | 2.794 | 1.861 | 1.074 |
| F-19 | 3.465 | 2.735 | 2.097 | 1.440 |
| F-20 | 2.821 | 2.293 | 1.681 | 0.793 |
| F-21 | 3.079 | 2.500 | 1.891 | 1.374 |

T: Tea plantation; R: Rice fields; F: Forest
